# Supplementary material for: Synthesis and characterization of acrylic polyols and polymers from soybean oils for pressure-sensitive adhesives
Source: Royal Society of Chemistry journal article supplement (doi:10.1039/c5ra04399a), 2015-01-01
Supplement: c5ra04399a1.pdf [file c5ra04399a1.pdf]

## **ELECTRONIC SUPPLEMENTARY INFORMATION**

### **Synthesis and characterization of acrylic polyols and polymers from soybean oils for pressure-sensitive adhesives**

Yonghui Li, Xiuzhi Susan Sun\*

Bio-Materials and Technology Lab, Department of Grain Science and Industry, Kansas  
State University, Manhattan, KS 66506

\*Correspondence to: Xiuzhi Susan Sun, E-mail: [xss@ksu.edu](mailto:xss@ksu.edu), Ph: 785-532-4077, fax:  
785-532-7193

**Table S1. Effect of soft monomer, hard monomer, and polar monomer on peel**

| DAESO1, g | 2-EHA, g | BA, g | MA, g | AA, g | MAA, g | PI, g | Rosin, g | Peel strength, N/in | Note    |
|-----------|----------|-------|-------|-------|--------|-------|----------|---------------------|---------|
| 1         | 0.9      |       |       | 0.1   |        | 0.06  | 0.5      | 4.47±0.13           |         |
| 1         |          | 0.9   |       | 0.1   |        | 0.06  | 0.5      | 1.25±1.05           | Rigid   |
| 1         |          |       | 0.9   | 0.1   |        | 0.06  | 0.5      | 0.85±0.80           | Rigid   |
| 1         | 0.9      |       |       |       | 0.1    | 0.06  | 0.5      | 6.88±0.53           | 100% CF |

**Table S2. Effect of AA amount on PSA peel adhesion**

| DAESO1, g | 2-EHA, g | AA, g | PI, g | Rosin, g | Peel strength, N/in | Note  |
|-----------|----------|-------|-------|----------|---------------------|-------|
| 1         | 1        | 0     | 0.06  | 0.5      | 2.62±0.06           |       |
| 1         | 0.9      | 0.1   | 0.06  | 0.5      | 4.47±0.13           |       |
| 1         | 0.8      | 0.2   | 0.06  | 0.5      | 2.65±1.20           | rigid |

**Table S3. Effect of acrylic polyol/2-EHA ratio on PSA peel adhesion**

| DAESO1, g | 2-EHA, g | AA, g | PI, g | Rosin, g | Peel strength, N/in | Note            |
|-----------|----------|-------|-------|----------|---------------------|-----------------|
| 0.75      | 1.15     | 0.1   | 0.06  | 0.5      | 4.29±0.17           | Too soft, 1/3CF |
| 0.9       | 1.0      | 0.1   | 0.06  | 0.5      | 4.75±0.18           |                 |
| 1         | 0.9      | 0.1   | 0.06  | 0.5      | 4.47±0.13           |                 |
| 1.1       | 0.8      | 0.1   | 0.06  | 0.5      | 3.71±0.87           | Slightly rigid  |
| 1.25      | 0.65     | 0.1   | 0.06  | 0.5      | 2.87±0.60           | some rigid      |
| 1.5       | 0.4      | 0.1   | 0.06  | 0.5      | 1.82±0.87           | Rigid           |

**Table S4. Effect of rosin on PSA peel adhesion**

| DAESO1, g | 2-EHA, g | AA, g | PI, g | Rosin, g | Peel strength, N/in | Note |
|-----------|----------|-------|-------|----------|---------------------|------|
| 1         | 0.9      | 0.1   | 0.06  | 0        | 0.76±0.06           |      |
| 1         | 0.9      | 0.1   | 0.06  | 0.5      | 4.47±0.13           |      |
| 1         | 0.9      | 0.1   | 0.06  | 0.7      | 7.50±1.04           | CF   |
| 1         | 0.9      | 0.1   | 0.06  | 1        | 9.04±3.68           | CF   |
| 1         | 0.9      | 0.1   | 0.06  | 1.5      | 3.61±1.80           | CF   |

Note: 2-EHA, 2-ethylhexyl acrylate; BA, butyl acrylate; MA, methyl acrylate; AA, acrylic acid; MAA, methacrylic acid; PI, photoinitiator

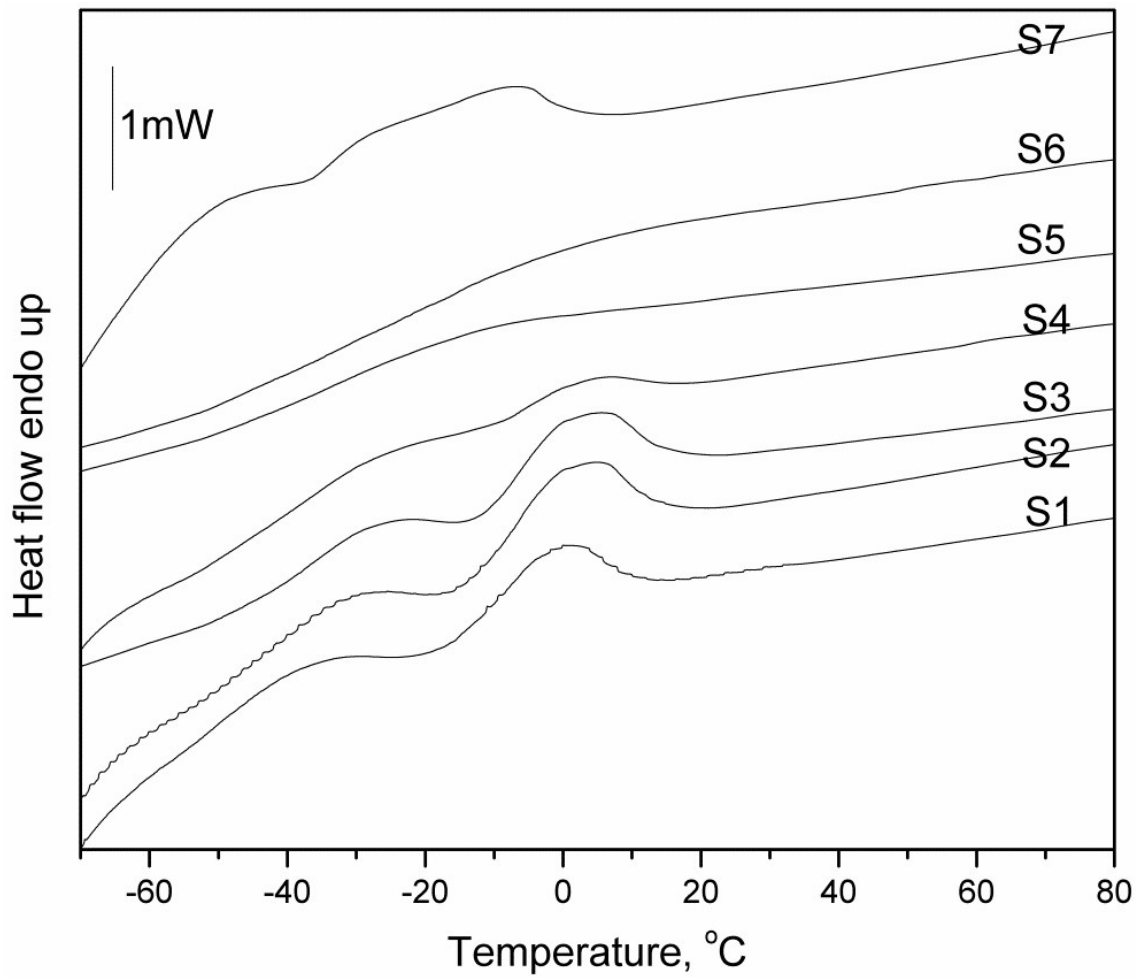

Figure S1. DSC thermograms of polymers.
